# Supplementary material for: Mixed-dimensional organic–inorganic metal halide perovskite (OIMHP) based gas sensors with superior stability for NO2 detection
Source: Royal Society of Chemistry journal article supplement (doi:10.1039/d1ma00976a), 2021-12-03
Supplement: d1ma00976a1.pdf [file d1ma00976a1.pdf]

## **Supporting Information: Mixed-dimensional organic-inorganic metal halide perovskites (OIMHP) based gas sensors with superior stability for NO<sub>2</sub> detection**

The Duong<sup>a,†,\*</sup>, Alishba T. John<sup>b,†</sup>, Hongjun Chen<sup>c,\*</sup>, Huyen Pham<sup>d</sup>, Krishnan Murugappan<sup>b</sup>, Thanh Tran-Phu<sup>b,e</sup>, Antonio Tricoli<sup>b,e</sup>, Kylie Catchpole<sup>a</sup>

<sup>a</sup>School of Engineering, The Australian National University, Canberra 2601, Australia

<sup>b</sup>Nanotechnology Research Laboratory, Research School of Chemistry, College of Science, The Australian National University, Canberra 2601, Australia

<sup>c</sup>The University of Sydney Nano Institute (Sydney Nano) and School of Physics, University of Sydney, Sydney 2006, Australia

<sup>d</sup>Department of Electronic Materials Engineering, Research School of Physics, The Australian National University, Canberra 2601, Australia

<sup>e</sup>Nanotechnology Research Laboratory, School of Biomedical Engineering, Faculty of Engineering, the University of Sydney, Sydney 2006, Australia

<sup>†</sup>These authors contribute equally.

**\*Corresponding Authors:** the.duong@anu.edu.au; hongjun.chen@sydney.edu.au

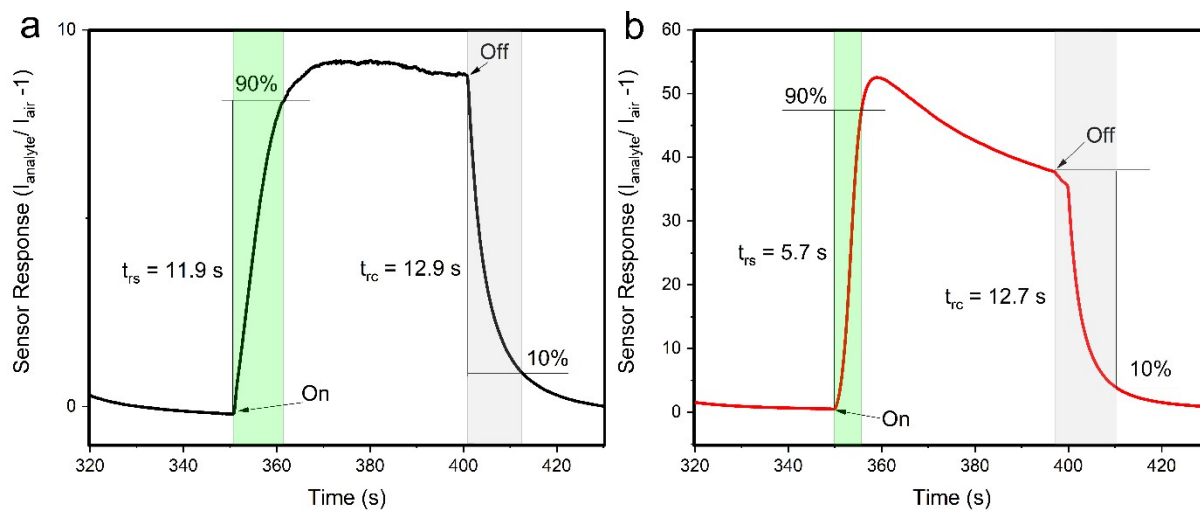

**Figure S1.** Response and recovery time of **a** – 3D and **b** – 2D/3D perovskite gas sensors for the detection of 8 ppm of  $\text{NO}_2$  gas.

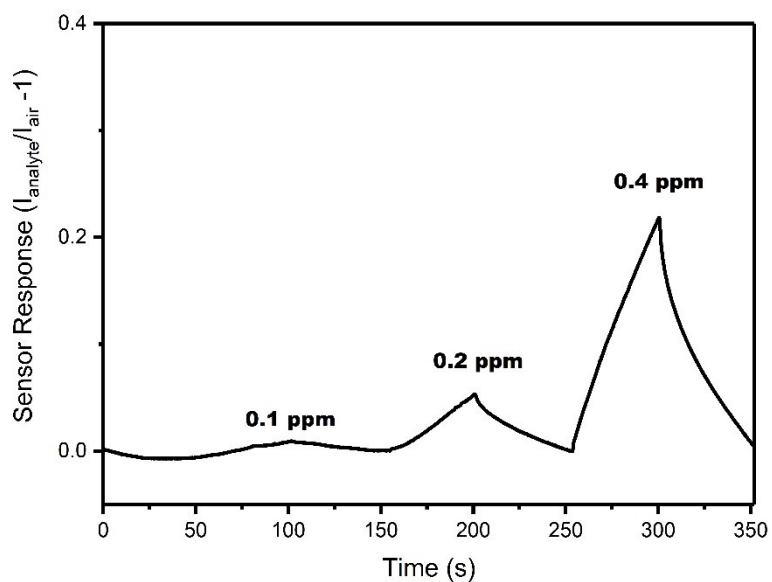

**Figure S2.** Gas sensing characterization of the 2D/3D perovskite sensor to sub-ppm  $\text{NO}_2$  concentrations.

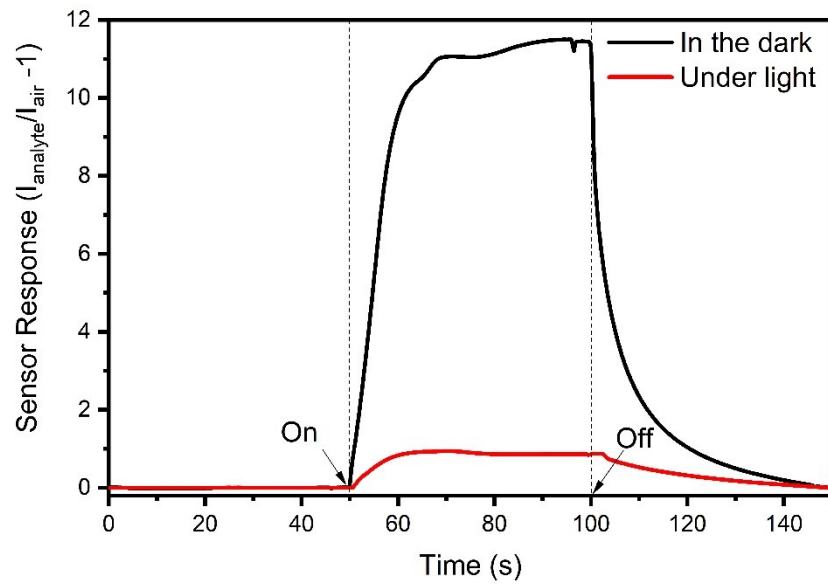

**Figure S3.** Comparison of the performance of the 3D perovskite-based sensor to 8 ppm NO<sub>2</sub> when operating in the dark and under light with an applied bias of 1 V.

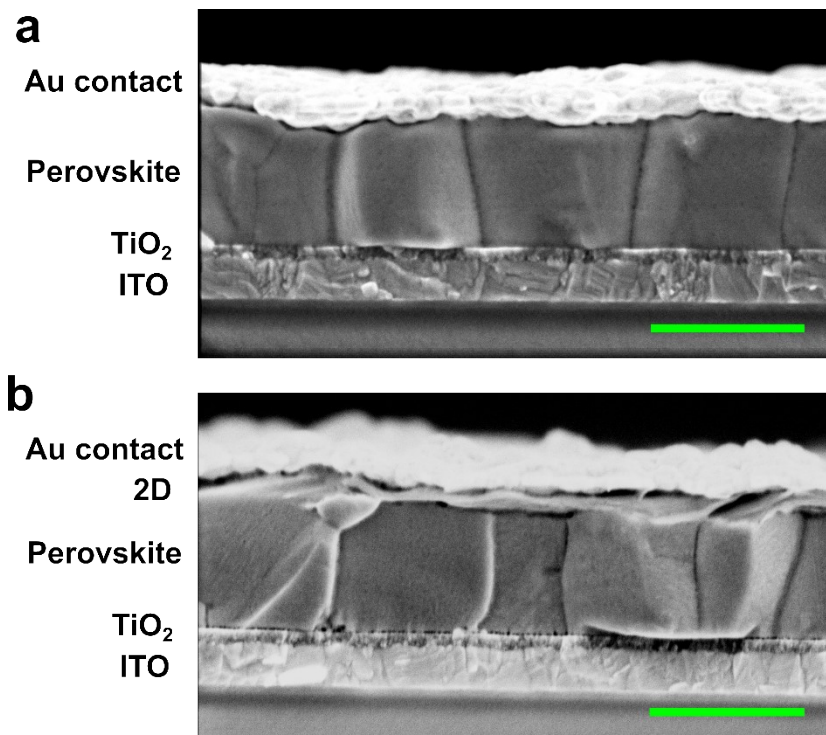

**Figure S4.** Cross-sectional SEM images of perovskite sensor devices **a** – 3D device, **b** – 2D/3D perovskite device with 10.0 mg/ml of the passivation precursor. The scale bar is 500 nm.

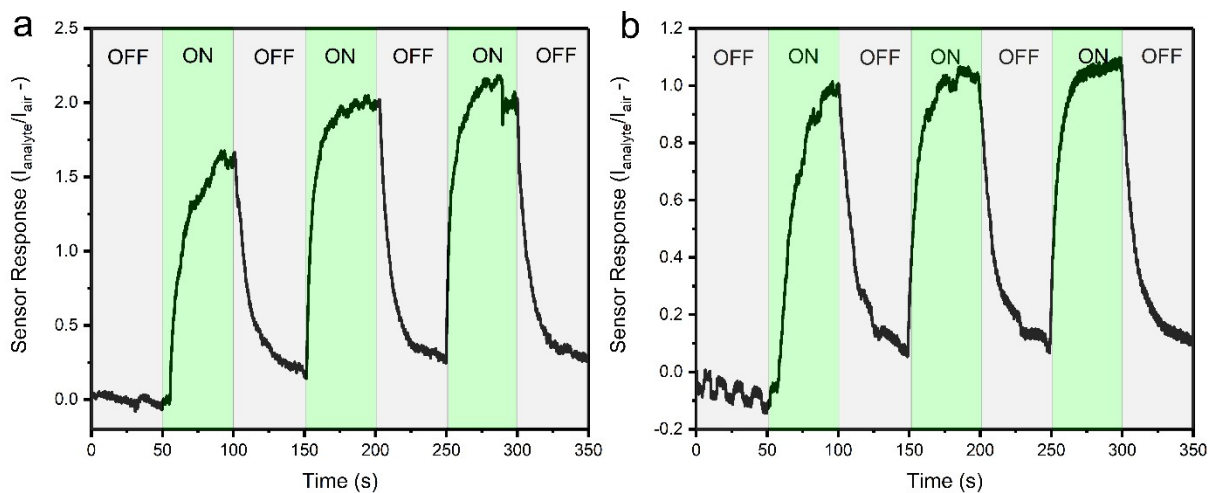

**Figure S5.** Sensor response of 2D/3D perovskite with different concentrations of the passivation solution for consecutive detection of 8 ppm of  $\text{NO}_2$  gas **a** – 5.0 mg/ml and **b** – 10.0 mg/ml.

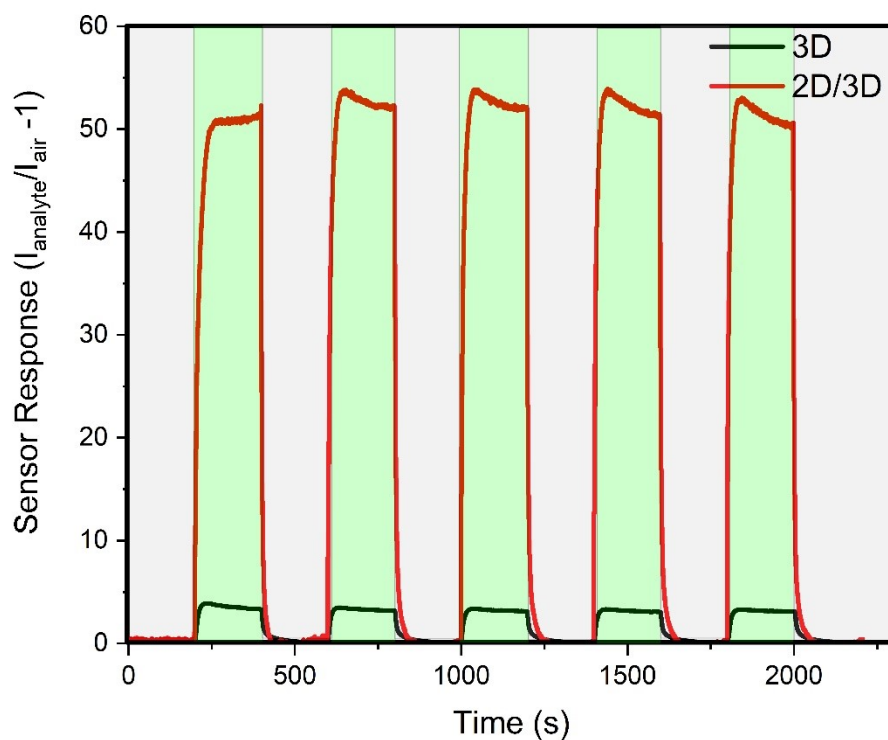

**Figure S6.** Short-term operation of 3D and 2D/3D perovskite sensors in a 40% RH environment for the consecutive detection of 8 ppm of  $\text{NO}_2$  gas.

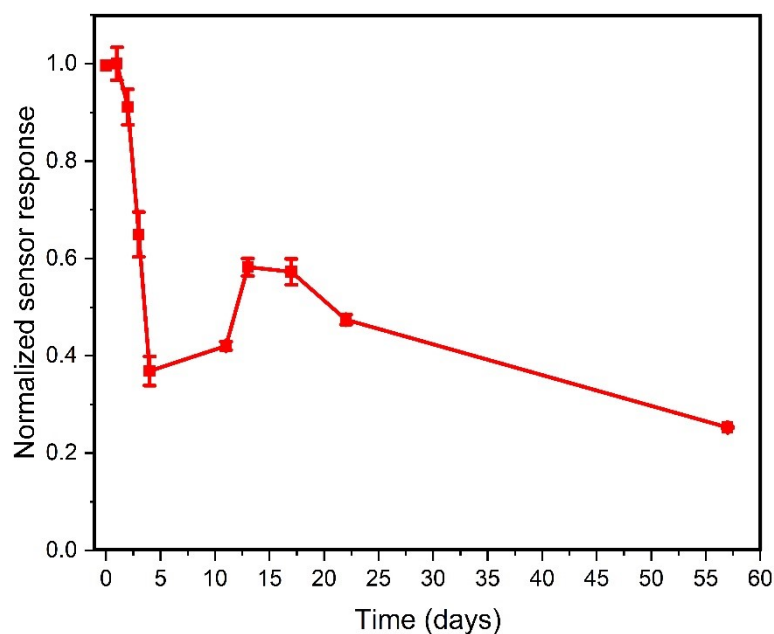

**Figure S7.** Normalized sensor response of the 2D/3D perovskite sensor device with ambient stability over almost 2 months.

**Table S1.** Summary of recent reports on state-of-the-art room-temperature operating metal oxide - based NO<sub>2</sub> gas sensors and comparison with this work.

| Materials                                 | Required activation | Sensor response<br>$\left(\frac{I_{analyte}}{I_{air}} - 1\right)$<br>(NO <sub>2</sub> concentration) | Limit of Detection (LOD) | Response / Recovery Time | Reference, year     |
|-------------------------------------------|---------------------|------------------------------------------------------------------------------------------------------|--------------------------|--------------------------|---------------------|
| Mixed 2D/3D perovskite                    | No                  | 45.2 (8 ppm)                                                                                         | 0.2 ppm                  | 5.7 s / 12.7 s           | This work           |
| SnO <sub>2</sub> -boron nitride nanotubes | No                  | 119.6 (250 ppm)                                                                                      | 250 ppb                  | 51 s / 42 s              | <sup>1</sup> , 2021 |
| CuO/rGO                                   | No                  | ~4 (5 ppm)                                                                                           | 50 ppb                   | 6.8 s / not mentioned    | <sup>2</sup> , 2021 |
| MoS <sub>2</sub> /ZnO                     | Light               | 0.91 (5 ppb)                                                                                         | 0.2 ppb*                 | Not mentioned            | <sup>3</sup> , 2021 |
| ZnO/TiO <sub>2</sub> /Au nps              | Light               | 7.5 (50 ppm)                                                                                         | Not mentioned            | 43 s / 50 s              | <sup>4</sup> , 2021 |

|                                                       |       |                      |               |                               |                      |
|-------------------------------------------------------|-------|----------------------|---------------|-------------------------------|----------------------|
| Fe <sub>2</sub> O <sub>3</sub> NRs/rGO                | No    | 23.8 (5 ppm)         | 1 ppm         | 15 s / not mentioned          | <sup>5</sup> , 2021  |
| macro-<br>/mesoporous ZnO                             | Light | 13.1 (400 ppb)       | 0.2 ppb       | 19 s / 32 s                   | <sup>6</sup> , 2020  |
| ZnO/TiO <sub>2</sub>                                  | Light | 1.05 (5 ppm)         | Not mentioned | 26 s / 224 s                  | <sup>7</sup> , 2020  |
| SnO <sub>2</sub> @SnS <sub>2</sub> nano<br>structures | Light | 4 – 6.5<br>(0.2 ppm) | Not mentioned | 950 s / 1160 s                | <sup>8</sup> , 2020  |
| ZnO/polypeptides                                      | Light | 4 – 13 (25 ppm)      | Not mentioned | 11 – 19 s / 25<br>– 31 s      | <sup>9</sup> , 2020  |
| ZnO<br>nanoparticles                                  | Light | 0.2 (25 ppb)         | 1 ppb*        | >5 minutes /<br>not mentioned | <sup>10</sup> , 2019 |
| rGO/CO <sub>3</sub> O <sub>4</sub>                    | No    | 0.268 (5 ppm)        | 0.05 ppm*     | 1.5 minutes /<br>40 minutes   | <sup>11</sup> , 2018 |
| CuO/rGO                                               | No    | 14 (1 ppm)           | 60 ppb        | 66 s / 34 s                   | <sup>12</sup> , 2018 |
| rGO/ZnO                                               | No    | 0.484 (40 ppm)       | Not mentioned | Not mentioned                 | <sup>13</sup> , 2018 |
| CuO platelets                                         | No    | 5737.7 (40 ppm)      | Not mentioned | 34 s / not<br>mentioned       | <sup>14</sup> , 2018 |
| CuO-ZnO/rGO                                           | No    | 0.629 (40 ppm)       | Not mentioned | 40 s / not<br>mentioned       | <sup>15</sup> , 2018 |

\* theoretical calculation based on signal to noise ratio.

**Note S1.** Energy dispersive X-ray spectroscopy (EDS) measurements and analysis of 3D and 2D/3D perovskite films.

| Element | 3D perovskite<br>Atomic % | 2D/3D perovskite<br>Atomic % |
|---------|---------------------------|------------------------------|
| C       | 23.82                     | 26.81                        |
| N       | 18.89                     | 19.54                        |
| Br      | 3.98                      | 3.78                         |
| In      | 2.80                      | 3.43                         |
| I       | 34.18                     | 32.72                        |
| Cs      | 1.65                      | 0.56                         |
| Pb      | 14.33                     | 13.16                        |
| Total:  | 100.00                    | 100.00                       |

**3D perovskite**

Electron Image 3

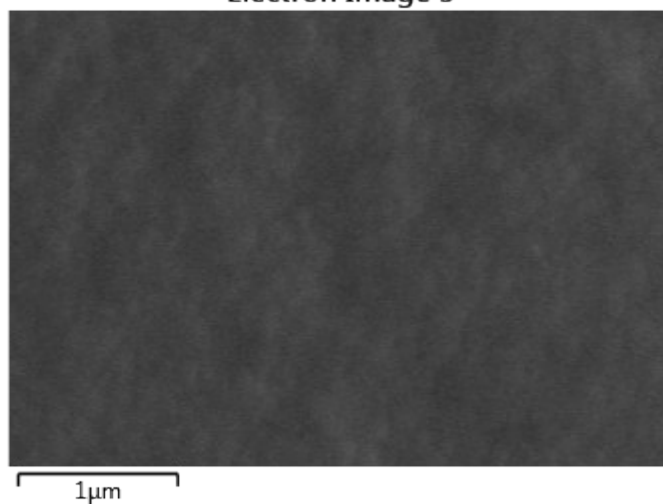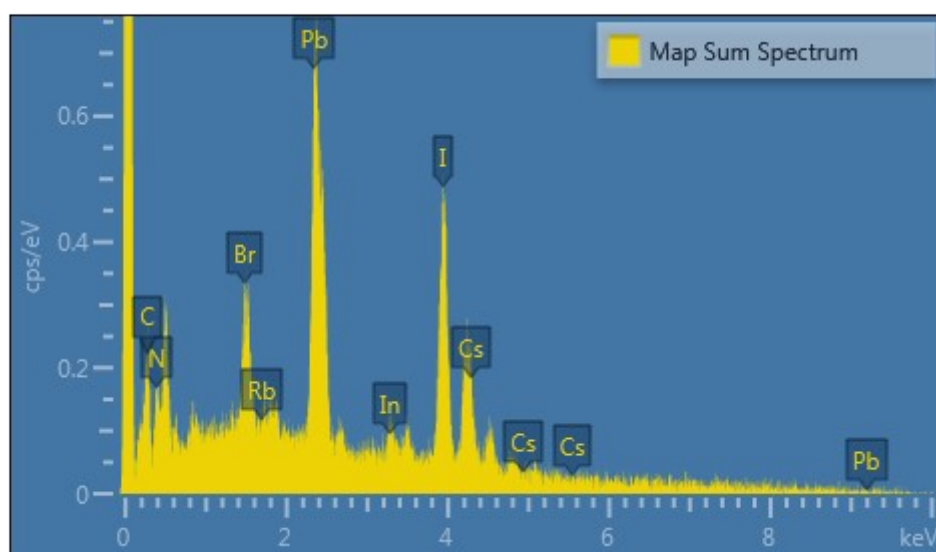



C K $\alpha$ 1\_2

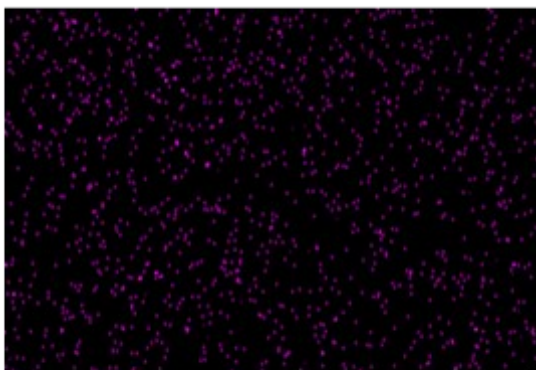

N K $\alpha$ 1\_2

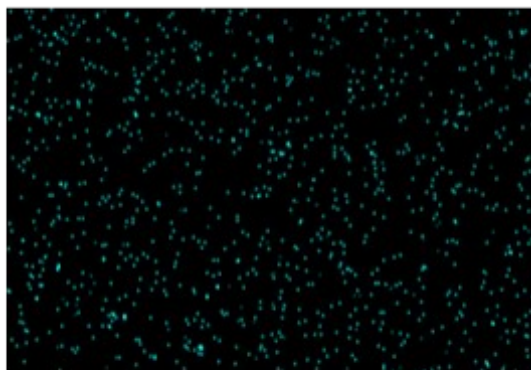

Br L $\alpha$ 1\_2

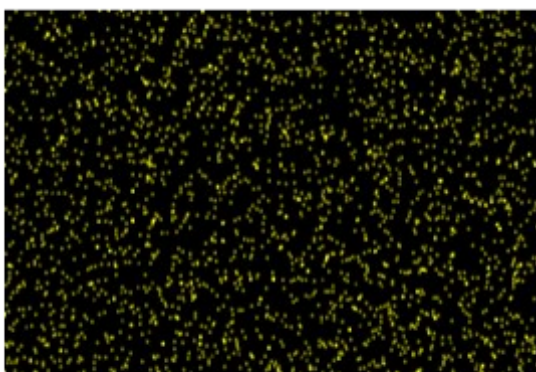

I L $\alpha$ 1

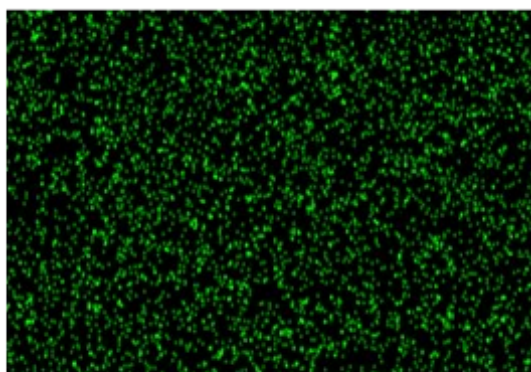

Cs L $\alpha$ 1

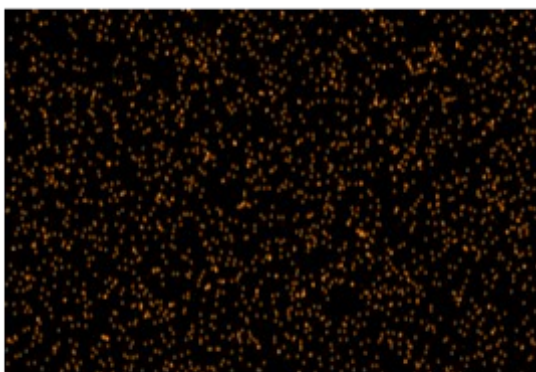

Pb M $\alpha$ 1

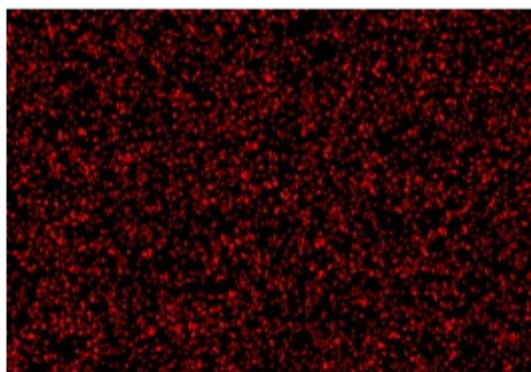

**2D/3D perovskite (5.0 mg/ml)**

Electron Image 4

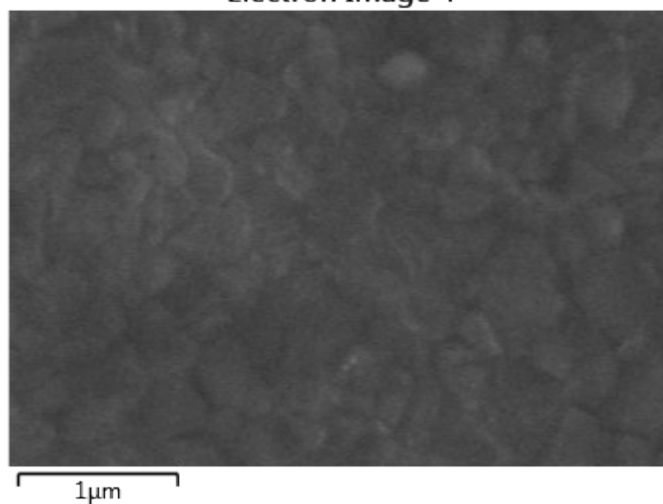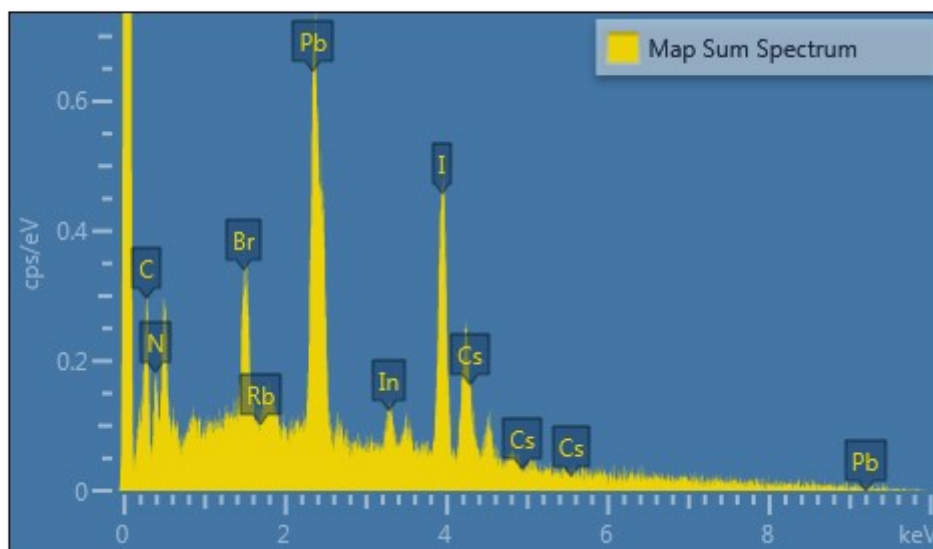

C K $\alpha$ 1\_2

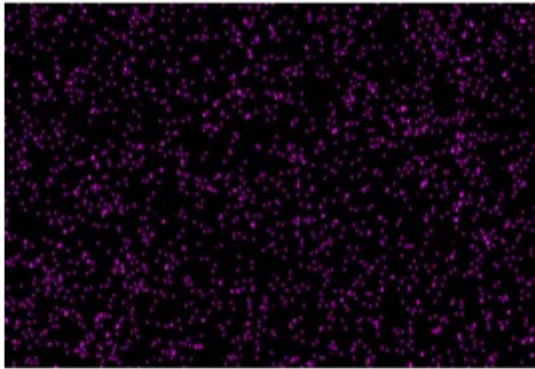

N K $\alpha$ 1\_2

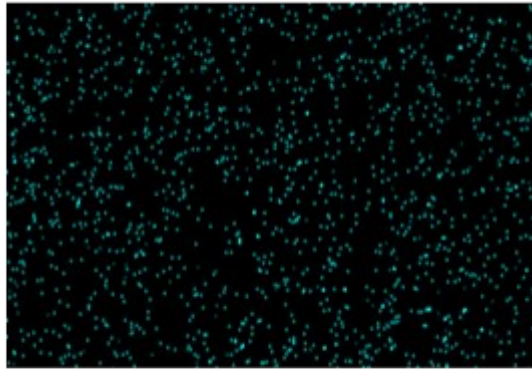

Br L $\alpha$ 1\_2

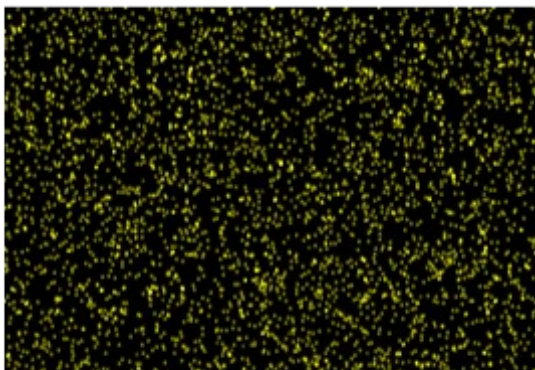

I L $\alpha$ 1

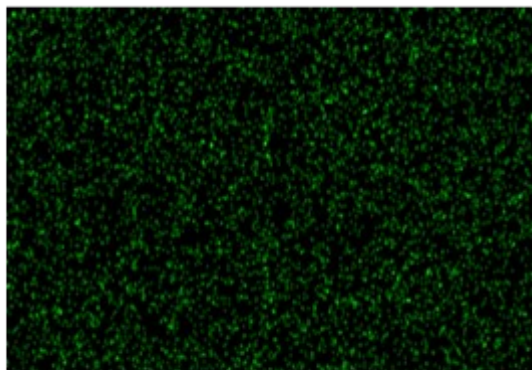

Cs L $\alpha$ 1

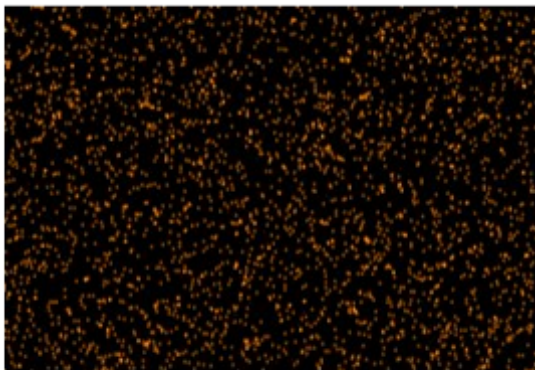

Pb M $\alpha$ 1

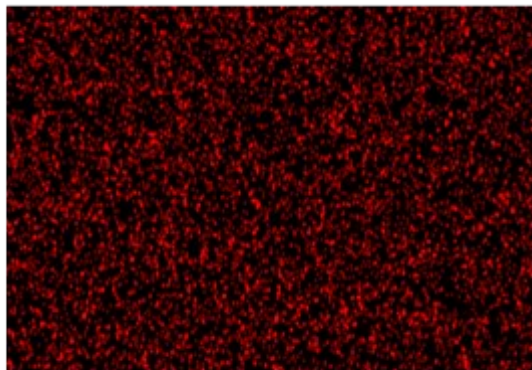

## References

1. Sharma, B.; Sharma, A.; Myung, J.-h., Selective ppb-level NO<sub>2</sub> gas sensor based on SnO<sub>2</sub>-boron nitride nanotubes. *Sensors and Actuators B: Chemical* **2021**, *331*, 129464.
2. Bai, H.; Guo, H.; Wang, J.; Dong, Y.; Liu, B.; Xie, Z.; Guo, F.; Chen, D.; Zhang, R.; Zheng, Y., A room-temperature NO<sub>2</sub> gas sensor based on CuO nanoflakes modified with rGO nanosheets. *Sensors and Actuators B: Chemical* **2021**, *337*, 129783.
3. Kumar, R. R.; Murugesan, T.; Dash, A.; Hsu, C.-H.; Gupta, S.; Manikandan, A.; Anbalagan, A. k.; Lee, C.-H.; Tai, N.-H.; Chueh, Y.-L.; Lin, H.-N., Ultrasensitive and light-activated NO<sub>2</sub> gas sensor based on networked MoS<sub>2</sub>/ZnO nanohybrid with adsorption/desorption kinetics study. *Appl. Surf. Sci.* **2021**, *536*, 147933.
4. Kwon, S.-H.; Kim, T.-H.; Kim, S.-M.; Oh, S.; Kim, K.-K., Ultraviolet light-emitting diode-assisted highly sensitive room temperature NO<sub>2</sub> gas sensors based on low-temperature solution-processed ZnO/TiO<sub>2</sub> nanorods decorated with plasmonic Au nanoparticles. *Nanoscale* **2021**, *13* (28), 12177-12184.
5. Tang, X.; Tian, C.; Zou, C., Highly sensitive and selective room-temperature NO<sub>2</sub> gas sensor based on novel Fe<sub>2</sub>O<sub>3</sub> nanorings/reduced graphene oxide heterojunction nanocomposites. *Optik* **2021**, *241*, 166951.
6. Xia, Y.; Zhou, L.; Yang, J.; Du, P.; Xu, L.; Wang, J., Highly Sensitive and Fast Optoelectronic Room-Temperature NO<sub>2</sub> Gas Sensor Based on ZnO Nanorod-Assembled Macro-/Mesoporous Film. *ACS Applied Electronic Materials* **2020**, *2* (2), 580-589.
7. Choi, H.-J.; Kwon, S.-H.; Lee, W.-S.; Im, K.-G.; Kim, T.-H.; Noh, B.-R.; Park, S.; Oh, S.; Kim, K.-K., Ultraviolet Photoactivated Room Temperature NO<sub>2</sub> Gas Sensor of ZnO Hemitubes and Nanotubes Covered with TiO<sub>2</sub> Nanoparticles. **2020**, *10* (3), 462.
8. Liu, D.; Tang, Z.; Zhang, Z., Visible light assisted room-temperature NO<sub>2</sub> gas sensor based on hollow SnO<sub>2</sub>@SnS<sub>2</sub> nanostructures. *Sensors and Actuators B: Chemical* **2020**, *324*, 128754.
9. Feng, C.; Wen, F.; Ying, Z.; Li, L.; Zheng, X.; Zheng, P.; Wang, G., Polypeptide-assisted hydrothermal synthesis of ZnO for room temperature NO<sub>2</sub> gas sensor under UV illumination. *Chem. Phys. Lett.* **2020**, *754*, 137745.
10. Casals, O.; Markiewicz, N.; Fabrega, C.; Gràcia, I.; Cané, C.; Wasisto, H. S.; Waag, A.; Prades, J. D., A Parts Per Billion (ppb) Sensor for NO<sub>2</sub> with Microwatt ( $\mu$ W) Power Requirements Based on Micro Light Plates. *ACS Sensors* **2019**, *4* (4), 822-826.
11. Zhang, B.; Cheng, M.; Liu, G.; Gao, Y.; Zhao, L.; Li, S.; Wang, Y.; Liu, F.; Liang, X.; Zhang, T.; Lu, G., Room temperature NO<sub>2</sub> gas sensor based on porous Co<sub>3</sub>O<sub>4</sub> slices/reduced graphene oxide hybrid. *Sensors and Actuators B: Chemical* **2018**, *263*, 387-399.
12. Li, Z.; Liu, Y.; Guo, D.; Guo, J.; Su, Y., Room-temperature synthesis of CuO/reduced graphene oxide nanohybrids for high-performance NO<sub>2</sub> gas sensor. *Sensors and Actuators B: Chemical* **2018**, *271*, 306-310.
13. Jyoti; Kanaujiya, N.; Varma, G. D., Highly selective room temperature NO<sub>2</sub> gas sensor based on rGO-ZnO composite. **2018**, *1953* (1), 030039.
14. Oosthuizen, D. N.; Motaung, D. E.; Swart, H. C., In depth study on the notable room-temperature NO<sub>2</sub> gas sensor based on CuO nanoplatelets prepared by sonochemical method: Comparison of various bases. *Sensors and Actuators B: Chemical* **2018**, *266*, 761-772.
15. Jyoti; Varma, G. D., Synthesis of CuO-ZnO/rGO ternary composites for superior NO<sub>2</sub> gas sensor at room temperature. *Materials Research Express* **2018**, *6* (3), 035011.
